# Supplementary material for: Transcriptomic Insight into Terpenoid Biosynthesis and Functional Characterization of Three Diterpene Synthases in Scutellaria barbata
Source: MDPI journal article supplement (doi:10.3390/molecules23112952), 2018-11-12
Supplement: s1 [file s1]

## Supplementary

### Transcriptomic Insight into Terpenoid Biosynthesis and Functional Characterization of Three Diterpene Synthases in *Scutellaria barbata*

Huabei Zhang <sup>1,†</sup>, Baolong Jin <sup>1,2,†</sup>, Junling Bu <sup>1</sup>, Juan Guo <sup>1</sup>, Tong Chen <sup>1</sup>, Ying Ma <sup>1</sup>, Jinfu Tang <sup>1</sup>, Guanghong Cui <sup>1,\*</sup> and Luqi Huang <sup>1,2,\*</sup>

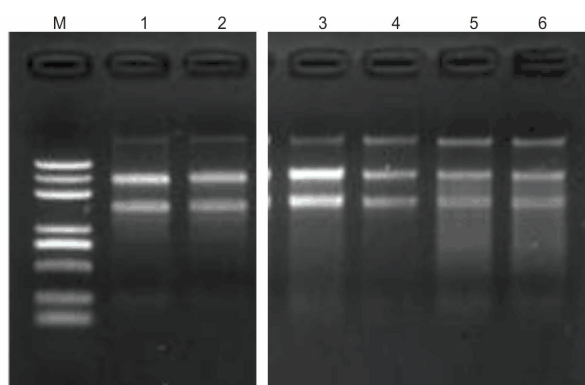

Figure S1. The agarose gel electrophoresis analysis of total RNA from *S. barbata*. M, DNA ladder; 1, aerial part 1; 2, aerial part 2; 3, root 1; 4, root 2; 5, flower 1; 6, flower 2.

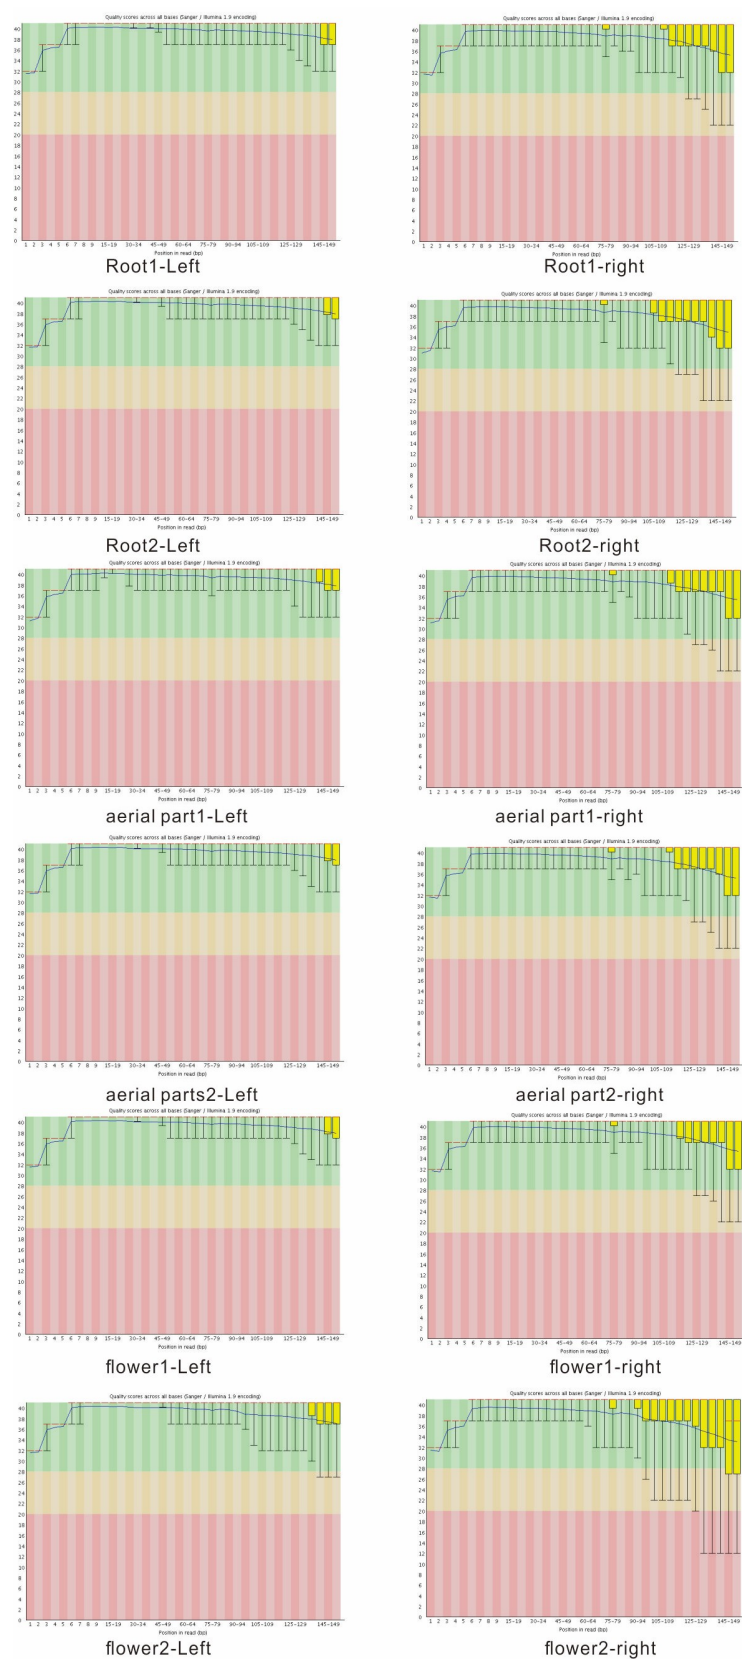

**Figure S2.** Sequencing quality estimation for the six samples. Each shows the Per base quality for left reads and right reads.

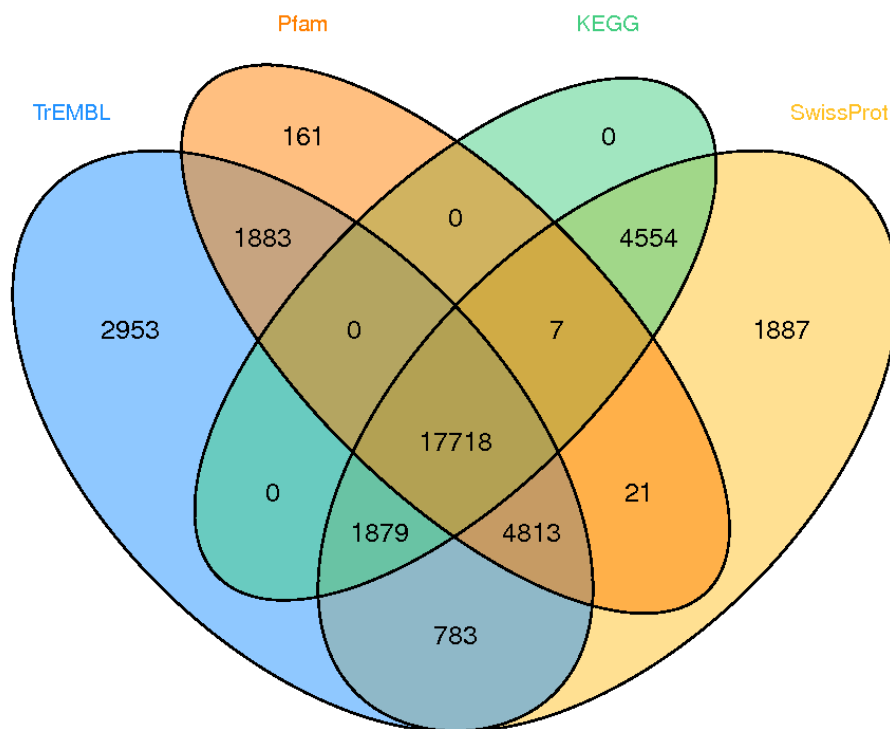

Figure S3. Summary of genes annotated to Swiss-Prot, TrEMBL and Pfam.

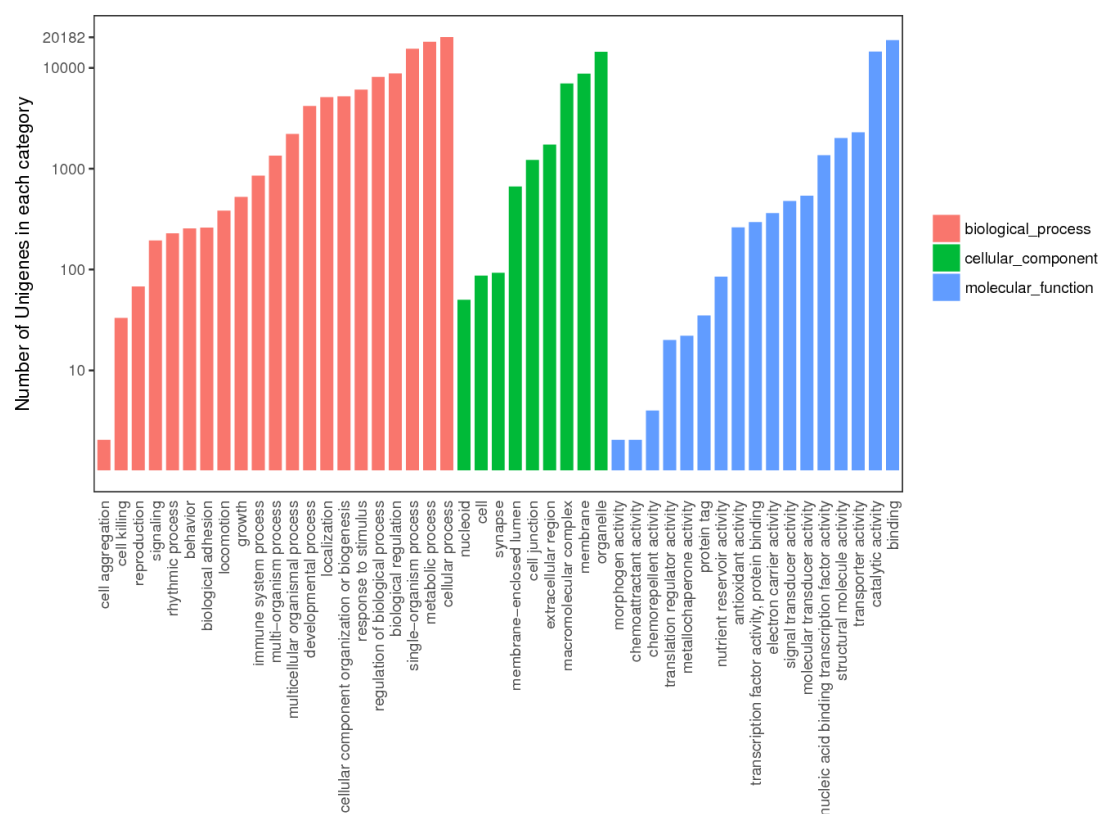

Figure S4. Summary of Gene Ontology annotation for all UniGenes

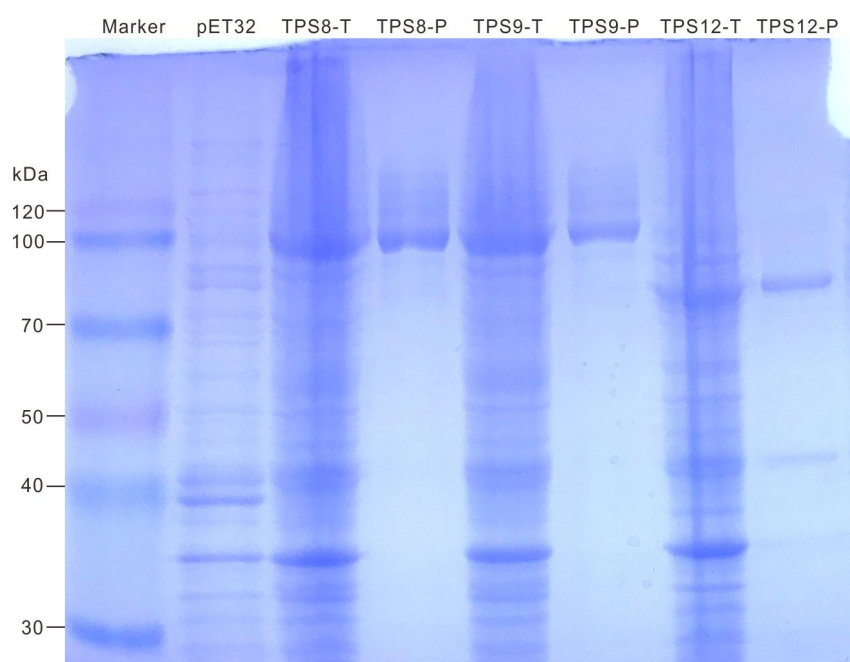

**Figure S5.** The sodium dodecyl sulphate-polyacrylamide gel electrophoresis (SDS-PAGE) analysis of the recombinant of TPS8, TPS9 and TPS12. T, total protein, P, purified protein using nickel-nitrilotriacetic acid agarose beads.

Table S1. The quality of total RNA from *S. barbata*

| No. | Sample | conc.<br>(ng/μl) | volume (μl) | amount(μg) | OD260/280 | OD260/230 | 25S/18S | RIN |
|-----|--------|------------------|-------------|------------|-----------|-----------|---------|-----|
| 1   | AP1    | 1680             | 18          | 30.24      | 2.09      | 2.393     | 1.5     | 8.9 |
| 2   | AP2    | 1050             | 6           | 6.3        | 2.141     | 2.471     | 1.5     | 8.9 |
| 3   | RT1    | 266              | 33          | 8.778      | 1.928     | 2.078     | 1.6     | 9.2 |
| 4   | RT2    | 302              | 38          | 11.416     | 1.841     | 2.068     | 1.3     | 9   |
| 5   | FL1    | 1370             | 21          | 28.77      | 2.213     | 2.445     | 0.6     | 6.5 |
| 6   | FL2    | 1124             | 33          | 37.092     | 2.081     | 2.442     | 0.6     | 6.5 |

**Table S2. Summary of sequencing reads** (1-pair sequence left, 2- pair sequence right)

| Sample           | Total reads | Total bases   | Sequence length (nt) | GC content (%) |
|------------------|-------------|---------------|----------------------|----------------|
| Root_1_1         | 18,171,779  | 2,725,766,850 | 150                  | 45             |
| Root_1_2         | 18,171,779  | 2,725,766,850 | 150                  | 45             |
| Root_2_1         | 20,291,672  | 3,043,750,800 | 150                  | 45             |
| Root_2_2         | 20,291,672  | 3,043,750,800 | 150                  | 45             |
| Aerial parts_1_1 | 21,428,637  | 3,214,295,550 | 150                  | 46             |
| aerial parts_1_2 | 21,428,637  | 3,214,295,550 | 150                  | 46             |
| aerial parts_2_1 | 20,110,277  | 3,016,541,550 | 150                  | 46             |
| aerial parts_2_2 | 20,110,277  | 3,016,541,550 | 150                  | 46             |
| Flower_1_1       | 18,935,106  | 2,840,265,900 | 150                  | 45             |
| Flower_1_2       | 18,935,106  | 2,840,265,900 | 150                  | 45             |
| Flower_2_1       | 19,821,205  | 2,973,180,750 | 150                  | 45             |
| Flower_2_2       | 19,821,205  | 2,973,180,750 | 150                  | 45             |

**Table S3. Stats for all *de novo* assembled transcript contigs.** Given a set of contigs, each with its own length, the N50 length is defined as the length for which the collection of all contigs of that length or longer contains at least half of the sum of the lengths of all contigs, and for which the collection of all contigs of that length or shorter also contains at least 50% of the sum of the lengths of all contigs.

| Item                                  | Value       |
|---------------------------------------|-------------|
| Total trinity 'genes'                 | 52,211      |
| Total trinity transcripts             | 88,980      |
| GC content (%)                        | 42.2        |
| Stats based on ALL transcript contigs |             |
| Contig N10 (nt)                       | 4,534       |
| Contig N20 (nt)                       | 3,570       |
| Contig N30 (nt)                       | 2,976       |
| Contig N40 (nt)                       | 2,523       |
| Contig N50 (nt)                       | 2,144       |
| The minimum length (nt)               | 201         |
| Median contig length (nt)             | 1,022       |
| Average contig length (nt)            | 1,370.60    |
| Total assembled bases                 | 121,958,564 |



**Table S5.** Genes information in diterpenoid backbone biosynthesis pathway in *S. barbata*.

| Enzyme                                 | Enzyme Name                                              | Expression Level |     |     | Unigene (bp)      | Protein (aa) | Accession No. <sup>b</sup> | Orthology <sup>c</sup> |
|----------------------------------------|----------------------------------------------------------|------------------|-----|-----|-------------------|--------------|----------------------------|------------------------|
|                                        |                                                          | RT               | LF  | FL  |                   |              |                            |                        |
| Mevalonate Pathway (MVA Pathway)       |                                                          |                  |     |     |                   |              |                            |                        |
| AACT1                                  | Acetyl-CoA acetyltransferase                             | 131              | 63  | 123 | 2406              | 403          | MK035027                   | 2                      |
| AACT2                                  |                                                          | 26               | 13  | 28  | 2223              | 393          | MK035028                   |                        |
| HMGS                                   | Hydroxymethylglutaryl-CoA synthase                       | 66               | 39  | 74  | 2465              | 460          | MK035029                   | 1                      |
| HMGR1                                  | Hydroxymethylglutaryl-CoA reductase                      | 24               | 43  | 55  | 2353              | 550          | MK035030                   | 4                      |
| HMGR2                                  |                                                          | 10               | 8   | 10  | 2058              | 568          | MK035031                   |                        |
| HMGR3                                  |                                                          | 76               | 3   | 96  | 2629              | 593          | MK035032                   |                        |
| MVK                                    | Mevalonate kinase                                        | 30               | 22  | 47  | 1995              | 389          | MK035033                   | 1                      |
| PMK                                    | Phosphomevalonate kinase                                 | 51               | 20  | 34  | 2413              | 508          | MK035034                   | 1                      |
| MDD1                                   | Mevalonate diphosphate decarboxylase                     | 41               | 10  | 24  | 1841              | 421          | MK035035                   | 1                      |
| MDD2                                   |                                                          | 59               | 37  | 53  | 2150              | 419          | MK035036                   |                        |
| Methylerythritol Pathway (MEP Pathway) |                                                          |                  |     |     |                   |              |                            |                        |
| DXS1                                   | 1-deoxy-D-xylulose-5-phosphate synthase                  | 2                | 51  | 13  | 2685              | 715          | MK035037                   | 5                      |
| DXS2                                   |                                                          | 272              | 27  | 157 | 2834              | 726          | MK035038                   |                        |
| DXS3                                   |                                                          | 17               | 2   | 6   | 3744              | 712          | MK035039                   |                        |
| DXS4                                   |                                                          | 13               | 16  | 19  | 3485              | 684          | MK035040                   |                        |
| DXS5                                   |                                                          | 6                | 42  | 25  | 3121              | 719          | MK035041                   |                        |
| DXR                                    | 1-deoxy-D-xylulose-5-phosphate reductoisomerase          | 125              | 95  | 117 | 2109              | 417          | MK035042                   | 1                      |
| MCT                                    | 2-C-methyl-D-erythritol 4-phosphate cytidyltransferase   | 26               | 56  | 19  | 1218              | 307          | MK035043                   | 1                      |
| CMK                                    | 4-(cytidine-5'-diphospho)-2-C-methyl-D-erythritol kinase | 67               | 45  | 22  | 1247              | 332          | MK035044                   | 1                      |
| MDS                                    | 2-C-methyl-D-erythritol 2,4-cyclodiphosphate synthase    | 76               | 42  | 75  | 1699              | 234          | MK035045                   | 1                      |
| HDS                                    | (E)-4-hydroxy-3-methylbut-2-enyl diphosphate synthase    | 297              | 88  | 115 | 3271              | 742          | MK035046                   | 1                      |
| HDR1                                   | (E)-4-hydroxy-3-methylbut-2-enyl diphosphate reductase   | 22               | 32  | 13  | 1896              | 418          | MK035047                   | 2                      |
| HDR2                                   |                                                          | 197              | 77  | 193 | 2453              | 496          | MK035048                   |                        |
| IDI1                                   | Isopentenyl diphosphate isomerase                        | 102              | 63  | 144 | 3162              | 293          | MK035049                   | 2                      |
| IDI2                                   |                                                          | 2                | 0   | 1   | 1146 <sup>a</sup> | 238          | MK035050                   |                        |
| IPK                                    | Isopentenyl phosphate kinase                             | 11               | 25  | 18  | 2016              | 334          | MK035051                   | /                      |
| prenyltransferase                      |                                                          |                  |     |     |                   |              |                            |                        |
| FPS                                    | Farnesyl pyrophosphate synthase                          | 70               | 83  | 96  | 1713              | 349          | MK035052                   | 1                      |
| GGPPS1                                 | Geranylgeranyl pyrophosphate synthase                    | 36               | 158 | 41  | 2231              | 360          | MK035053                   | 7                      |
| GGPPS2                                 |                                                          | 2                | 3   | 3   | 1449              | 356          | MK035054                   |                        |
| GPPS.SSUI                              |                                                          | 13               | 5   | 4   | 1331              | 305          | MK035055                   |                        |
| GPPS.SSUII.1                           |                                                          | 228              | 14  | 52  | 2101              | 330          | MK035056                   |                        |
| GPPS.SSUII.2                           |                                                          | 13               | 64  | 28  | 1457              | 363          | MK035057                   |                        |
| GPPS.LSU1                              |                                                          | 127              | 28  | 60  | 1348              | 370          | MK035058                   |                        |
| GPPS.LSU2                              |                                                          | 11               | 4   | 8   | 1556              | 331          | MK035059                   |                        |

<sup>a</sup> unigenes without full length cDNAs. <sup>b</sup> The nucleotide sequences of identified genes can be found in the GenBank/EMBL data libraries. <sup>c</sup> Orthology genes in *Salvia miltiorrhiza*.

**Table S6.** Terpene synthase genes in *S. barbata*.

| Subfamily | Enzyme | Best Matches                 | Expression Level |    |     | Unigene (bp)      | Protein (aa) | Accession No. <sup>b</sup> |
|-----------|--------|------------------------------|------------------|----|-----|-------------------|--------------|----------------------------|
|           |        |                              | RT               | LF | FL  |                   |              |                            |
| TPS-a     | TPS1   | gamma-cadinene synthase      | 55               | 2  | 1   | 3110              | 549          | MK035060                   |
|           | TPS2   | gamma-cadinene synthase      | 2                | 0  | 1   | 1575 <sup>a</sup> | 470          | MK035061                   |
|           | TPS3   | gamma-cadinene synthase      | 1                | 0  | 1   | 2119              | 599          | MK035062                   |
|           | TPS4   | germacrene D synthase        | 39               | 4  | 4   | 2383              | 579          | MK035063                   |
|           | TPS5   | germacrene D synthase        | 1                | 0  | 2   | 1845              | 542          | MK035064                   |
| TPS-b     | TPS6   | (R)-limonene synthase        | 21               | 9  | 3   | 2709              | 590          | MK035065                   |
| TPS-g     | TPS7   | nerolidol synthase           | 0                | 3  | 2   | 1775              | 469          | MK035066                   |
| TPS-c     | TPS8   | Copalyl diphosphate synthase | 214              | 1  | 160 | 2793              | 803          | MK035061                   |
|           | TPS9   |                              | 1                | 1  | 1   | 2690              | 810          | MK035061                   |
|           | TP10   |                              | 1                | 6  | 3   | 1419 <sup>a</sup> |              | MK035061                   |
|           | TPS11  |                              | 2                | 23 | 5   | 2140 <sup>a</sup> | 518          | MK035061                   |
| TPS-e/f   | TPS12  | Kaurene synthase             | 37               | 4  | 37  | 3102              | 594          | MK035061                   |
|           | TPS13  |                              | 6                | 2  | 2   | 2749 <sup>a</sup> | 781          | MK035061                   |
|           | TPS14  |                              | 37               | 40 | 37  | 4714 <sup>a</sup> | 707          | MK035061                   |

<sup>a</sup> unigenes without full length cDNAs. The nucleotide sequences of identified genes can be found in the GenBank/EMBL data libraries. <sup>b</sup> The nucleotide sequences of identified genes can be found in the GenBank/EMBL data libraries.

**Table S7. List of plant DiTPS involved in this paper**

| Gene    | Species                     | GenBank<br>Accession | Funtional Annotation*                      | Ref.                          |
|---------|-----------------------------|----------------------|--------------------------------------------|-------------------------------|
| AgAS    | <i>Abies grandis</i>        | AAB05407             | abietadiene synthase                       | Vogel et al.,1996             |
| AbCAS   | <i>Abies balsamea</i>       | AEL99953             | cis-abienol synthase                       | Zerbe et al., 2012            |
| AtCPS   | <i>Arabidopsis thaliana</i> | AAA53632             | ent-copalyl diphosphatesynthas             | Sun et al., 1994              |
| AtKSL   | <i>A. thaliana</i>          | AAC39443             | ent-kaurene synthase                       | Yamaguchi et al., 1998        |
| CcCLS   | <i>Cistus creticus</i>      | ADJ93862             | copal-8-ol diphosphate synthase            | Falara et al., 2010           |
| CfTPS1  | <i>Coleus forskohlii</i>    | KF444506             | copalyl diphosphate synthase               | Pateraki et al., 2014         |
| CfTPS14 | <i>C. forskohlii</i>        | AGN70881             | ent-kaurene synthase                       | Zerbe et al., 2013            |
| CfTPS2  | <i>C. forskohlii</i>        | KF444507             | copal-8-ol diphosphate synthase            | Pateraki et al., 2014         |
| CfTPS3  | <i>C. forskohlii</i>        | KF444508             | (13R) manoyl oxide synthase                | Pateraki et al., 2014         |
| CfTPS4  | <i>C. forskohlii</i>        | KF444509             | miltiradiene synthase                      | Pateraki et al., 2014         |
| CmCPS1  | <i>Cucurbita maxima</i>     | AAD04292             | ent-copalyl diphosphate synthase           | Smith et al.,1998             |
| CmCPS2  | <i>C. maxima</i>            | AAD04293             | ent-copalyl diphosphate synthase           | Smith et al.,1998             |
| CmKS    | <i>C. maxima</i>            | AAB39482             | ent-kaurene synthase                       | Yamaguchi et al., 1996        |
| EpTPS1  | <i>Euphorbia peplus</i>     | KC702395             | ent-kaurene synthase                       | Zerbe et al., 2013            |
| EpTPS23 | <i>E. peplus</i>            | KP889108             | Class I diTPS                              | Andersen-Ranberg et al., 2016 |
| EpTPS7  | <i>E. peplus</i>            | AGN70883             | ent-copalyl diphosphate synthase           | Zerbe et al., 2013            |
| EpTPS8  | <i>E. peplus</i>            | KP889107             | Class I diTPS                              | Andersen-Ranberg et al., 2016 |
| GbLS    | <i>Ginkgo biloba</i>        | AAL09965             | levopimaradiene synthase                   | Schepmann et al., 2001        |
| GrTPS1  | <i>Grindelia robusta</i>    | AGN70886             | 13-labden-8,15-diol pyrophosphate synthase | Zerbe et al., 2013            |
| GrTPS2  | <i>G. robusta</i>           | KR089902             | labda-7,13E-dienyl diphosphate synthase    | Zerbe et al., 2015            |
| GrTPS4  | <i>G. robusta</i>           | KR089903             | ent-kaurene synthase                       | Zerbe et al., 2015            |
| GrTPS6  | <i>G. robusta</i>           | AGN70887             | manoyl oxide                               | Zerbe et al., 2013            |
| HvCPS   | <i>Hordeum vulgare</i>      | AAT49065             | ent-copalyl diphosphate synthase           | Spielmeyer et al., 2004       |
| HvKSL1  | <i>H. vulgare</i>           | AAT49066             | ent-kaurene synthase                       | Spielmeyer et al., 2004       |
| IeCPS1  | <i>Isodon eriocalyx</i>     | AEP03177             | ent-copalyl diphosphate synthase           | Li et al., 2012               |
| IeCPS2  | <i>I. eriocalyx</i>         | AEP03175             | ent-copalyl diphosphate synthase           | Li et al., 2012               |
| IrTPS2  | <i>I. rubescens</i>         | KX831650             | Class I diTPS                              | Pelot et al., 2017            |

|         |                          |          |                                             |                              |
|---------|--------------------------|----------|---------------------------------------------|------------------------------|
| IrCPS1  | <i>I. rubescens</i>      | KU180499 | copalyl diphosphate synthase                | Jin et al., 2017             |
| IrCPS2  | <i>I. rubescens</i>      | KU180500 | copalyl diphosphate synthase                | Jin et al., 2017             |
| IrCPS3  | <i>I. rubescens</i>      | KU180501 | unknown                                     | Jin et al., 2017             |
| IrCPS4  | <i>I. rubescens</i>      | KU180502 | ent-copalyl diphosphate synthase            | Jin et al., 2017             |
| IrCPS5  | <i>I. rubescens</i>      | KU180503 | ent-copalyl diphosphate synthase            | Jin et al., 2017             |
| IrKSL1  | <i>I. rubescens</i>      | KU180504 | multiradiene synthase/manoyl oxide synthase | Jin et al., 2017             |
| IrKSL2  | <i>I. rubescens</i>      | KU180505 | ent-isopimaradiene synthase                 | Jin et al., 2017             |
| IrKSL3  | <i>I. rubescens</i>      | KU180506 | multiradiene synthase/manoyl oxide synthase | Jin et al., 2017             |
| IrKSL4  | <i>I. rubescens</i>      | KX580633 | ent-atrisrene synthase                      | Jin et al., 2017             |
| IrKSL5  | <i>I. rubescens</i>      | KX580634 | ent- kaurene synthase                       | Jin et al., 2017             |
| IrKSL6  | <i>I. rubescens</i>      | KX580635 | isopimaradiene synthase                     | Jin et al., 2017             |
| LsCPS   | <i>Lactuca sativa</i>    | BAB12440 | ent-kaurene synthase                        | Sawada et al., 2008          |
| LsKS    | <i>L. sativa</i>         | BAB12441 | ent-kaurene synthase                        | Sawada et al., 2008          |
| MvCPS1  | <i>Marrubium vulgare</i> | KJ584450 | peregrinol diphosphate synthase             | Zerbe et al., 2014           |
| MvCPS3  | <i>M. vulgare</i>        | KJ584452 | copalyl diphosphate synthase                | Zerbe et al., 2014           |
| MvEKS   | <i>M. vulgare</i>        | KJ584453 | ent-kaurene synthase                        | Zerbe et al., 2014           |
| MvELS   | <i>M. vulgare</i>        | KJ584454 | 9,13-epoxy-labd-14-en synthase              | Zerbe et al., 2014           |
| NtABS   | <i>Nicotiana tabacum</i> | CD33019  | cis-abienol synthase                        | Sallaud et al., 2012         |
| NtCPS2  | <i>N. tabacum</i>        | CCD33018 | copal-8-ol diphosphate synthase             | Sallaud et al., 2012         |
| OsCPS1  | <i>Oryza sativa</i>      | BAD42449 | ent-copalyl diphosphate synthase            | Otomo et al., 2004           |
| OsCPS2  | <i>O. sativa</i>         | AAT11021 | ent-copalyl diphosphate synthase            | Prisic et al., 2004          |
| OsCPS4  | <i>O. sativa</i>         | AAS98158 | syn-copalyl diphosphate synthase            | Xu et al., 2004              |
| OsKLS8  | <i>O. sativa</i>         | Q6BDZ9   | stemar-13-ene synthase                      | Nemoto et al., 2004          |
| OsKS1   | <i>O. sativa</i>         | AAQ72559 | ent-kaurene synthase                        | Margis-Pinheiro et al., 2005 |
| OsKSL10 | <i>O. sativa</i>         | Q2QQJ5   | ent-sandaracopimara-8(14),15-diene synthase | Peters. 2006                 |
| OsKSL11 | <i>O. sativa</i>         | Q1AHB2   | stemod-13(17)-ene synthase                  | Morrone et al., 2006         |
| OsKSL4  | <i>O. sativa</i>         | AAU05906 | pimara-7,15-diene synthase                  | Wilderman et al., 2004       |
| OsKSL5  | <i>O. sativa</i>         | Q6Z5J6   | ent-pimara-8(14),15-diene synthase          | Margis-Pinheiro et al., 2005 |
| OsKSL6  | <i>O. sativa</i>         | A4KAG8   | ent-isokaure-15-ene synthase                | Xu et al., 2007              |

|          |                               |              |                                                       |                          |
|----------|-------------------------------|--------------|-------------------------------------------------------|--------------------------|
| OsKSL7   | <i>O. sativa</i>              | BAC56714     | <i>ent</i> -cassa-12,15-diene synthase                | Cho et al., 2004         |
| PaIso    | <i>Picea abies</i>            | AAS47690     | isopimaradiene synthase                               | Martin et al., 2004      |
| PaLAS    | <i>P. abies</i>               | AAS47691     | levopimaradiene/abietadiene synthase                  | Martin et al., 2004      |
| PgCPS    | <i>P. glauca</i>              | ADB55707     | <i>ent</i> -copalyl diphosphate synthase              | Keeling et al., 2010     |
| PgKS     | <i>P. glauca</i>              | ADB55708     | <i>ent</i> -kaurene synthase                          | Keeling et al., 2010     |
| PpCPS/KS | <i>Physcomitrella patens</i>  | BAF61135     | <i>ent</i> -kaurene synthase                          | Hayashi et al., 2006     |
| PsaCPS   | <i>Pisum sativum</i>          | AAB58822     | Bifunctional <i>ent</i> -copalyl diphosphate synthase | Ait-Ali et al., 1997     |
| PsCPS    | <i>P. sitchensis</i>          | ADB55709     | <i>ent</i> -copalyl diphosphate synthase              | Keeling et al., 2010     |
| PsIso    | <i>P. sitchensis</i>          | ADZ45512     | Isopimaradiene synthase                               | Keeling et al., 2011     |
| PsKS     | <i>P. sitchensis</i>          | ADB55710     | <i>ent</i> -kaurene synthase                          | Keeling et al., 2010     |
| PsLAS    | <i>P. sitchensis</i>          | ADZ45517     | Levopimaradiene/abietadiene synthase                  | Keeling et al., 2011     |
| PtKS     | <i>Populus trichocarpa</i>    | XP_002311286 | <i>ent</i> -kaurene synthase                          | Tuskan et al., 2006      |
| PxaTPS8  | <i>Pseudolarix amabilis</i>   | KU685114     | <i>Class I diTPS</i>                                  | Mafu S et al., 2017      |
| RcKSL1   | <i>Ricinus communis</i>       |              | <i>ent</i> -kaurene synthase                          | Jackson et al., 2014     |
| RcKSL2   | <i>R. communis</i>            |              | <i>ent</i> -trachylobane synthase                     | Jackson et al., 2014     |
| RcKSL3   | <i>R. communis</i>            |              | <i>ent</i> -sandaracopimaradiene synthase             | Jackson et al., 2014     |
| RcKSL4   | <i>R. communis</i>            |              | <i>ent</i> -beyerene synthase                         | Jackson et al., 2014     |
| RoCPS1   | <i>Rosmarinus officinalis</i> | KF805857     | copalyl diphosphate synthase                          | Brückner et al., 2014    |
| RoKSL1   | <i>R. officinalis</i>         | KF805858     | multiradiene synthase                                 | Brückner et al., 2014    |
| RoKSL2   | <i>R. officinalis</i>         | KF805859     | multiradiene synthase                                 | Brückner et al., 2014    |
| SdCPS    | <i>Scoparia dulcis</i>        | BAD91286     | <i>ent</i> -copalyl diphosphate synthase              | Nakagiri et al., 2005    |
| ShSBS    | <i>S. habrochaites</i>        | B8XA41       | santalene and bergamotene synthase                    | Sallaud et al., 2009     |
| SIPHS    | <i>Solanum lycopersicum</i>   | ACO56896     | phellandrene synthase                                 | Schilmiller et al., 2009 |
| SITPS24  | <i>S. lycopersicum</i>        | AEP82778     | <i>ent</i> -kaurene synthase                          | Falara et al., 2011      |
| SITPS40  | <i>S. lycopersicum</i>        | JN412074     | <i>ent</i> -copalyl diphosphate synthase              | Falara et al., 2011      |
| SmCPS1   | <i>S. miltiorrhiza</i>        | KC814639     | copalyl diphosphate synthase                          | Gao et al., 2009         |
| SmCPS2   | <i>S. miltiorrhiza</i>        | KC814640     | copalyl diphosphate synthase                          | Cui et al., 2015         |
| SmCPS3   | <i>S. miltiorrhiza</i>        | KC814641     | No function                                           | Cui et al., 2015         |
| SmCPS4   | <i>S. miltiorrhiza</i>        | KP063138     | labd-13-en-8-ol diphosphate synthase                  | Cui et al., 2015         |
| SmCPS5   | <i>S. miltiorrhiza</i>        | KC814642     | <i>ent</i> -copalyl diphosphate synthase              | Cui et al., 2015         |

|         |                                   |              |                                     |                                         |
|---------|-----------------------------------|--------------|-------------------------------------|-----------------------------------------|
| SmKSL1  | <i>S. miltiorrhiza</i>            | ABV08817     | miltiradiene synthase               | Gao et al.,2009                         |
| SmKSL2  | <i>S. miltiorrhiza</i>            | KC814643     | ent-kaurene synthase                | Cui et al., 2015                        |
| SmMDS   | <i>Selaginella moellendorffii</i> | AB668998     | miltiradiene synthase               | Sugai et al., 2011                      |
| SrCPS   | <i>Stevia rebaudiana</i>          | AAB87091     | ent-copalyl diphosphate synthase    | Richman et al., 1999                    |
| SrKS1   | <i>S. rebaudiana</i>              | AAD34294     | ent-kaurene synthase                | Richman et al., 1999                    |
| SrKS2   | <i>S. rebaudiana</i>              | AAD34295     | ent-kaurene synthase                | Richman et al., 1999                    |
| SsLPS   | <i>Salvia sclarea</i>             | AET21247     | copal-8-ol diphosphate synthase     | Schalk et al., 2012                     |
| SsScS   | <i>S. sclarea</i>                 | AET21246     | sclareol synthase                   | Schalk et al., 2012                     |
| TaKSL5  | <i>Triticum aestivum</i>          | BAL41692     | nerolidol synthase                  | Hillwig et al., 2011                    |
| TcTS    | <i>Taxus brevifolia</i>           | AAC49310     | taxadiene synthase                  | Wildung and Croteau.1996                |
| TwTPS21 | <i>T. Wilfordii</i>               | KP889112     | Ent-copal-8-ol diphosphate synthase | Andersen-Ranberg et al., 2016           |
| TwTPS14 | <i>Tripterygium wilfordii</i>     | KP889111     | kolavenyl diphosphate synthase      | Andersen-Ranberg et al., 2016           |
| TwTPS27 | <i>T. Wilfordii</i>               | KU948698     | Class I diTPS                       | Hansen et al., 2017                     |
| TwTPS16 | <i>T. Wilfordii</i>               | KU948697     | Class I diTPS                       | Hansen et al., 2017                     |
| TwTPS17 | <i>T. Wilfordii</i>               | KU948695     | Class I diTPS                       | Hansen et al., 2017                     |
| TwTPS18 | <i>T. Wilfordii</i>               | KU948696     | Class I diTPS                       | Hansen et al., 2017                     |
| TwTPS3  | <i>T. Wilfordii</i>               | KU948707     | Ent-copalyl diphosphate synthase    | Hansen et al., 2017                     |
| TwTPS9  | <i>T. Wilfordii</i>               | KU948709     | copalyl diphosphate synthase        | Hansen et al., 2017                     |
| TwTPS10 | <i>T. Wilfordii</i>               | KU948708     | kolavenyl diphosphate synthase      | Hansen et al., 2017                     |
| ZmAn1   | <i>Zea mays</i>                   | AAA73960     | ent-copalyl diphosphate synthase    | Bensen et al., 1995                     |
| ZmAn2   | <i>Z. mays</i>                    | AAT70083     | ent-copalyl diphosphate synthase    | Bensen et al., 1995                     |
| ZmTPS1  | <i>Zea mays</i>                   | NP_001105097 | sesquiterpene synthase              | Schnee et al., 2002                     |
| SfCPS   | <i>S. fruticosa</i>               | KP091840     | copalyl diphosphate synthase        | Božić et al.,2015                       |
| SfKSL   | <i>S. fruticosa</i>               | KP091841     | miltiradiene synthase               | Božić et al., 2015                      |
| SdCPS1  | <i>S. divinorum</i>               | KX424876     | ent-copalyl diphosphate synthas     | Pelot et al., 2017                      |
| SdCPS2  | <i>S. divinorum</i>               | KX424877     | clerodienyl diphosphate             | Pelot et al., 2017<br>Chen et al., 2017 |
| SdKSL1  | <i>S. divinorum</i>               | KY057342     | ent-kaurene synthase like           | Pelot et al., 2017                      |
| TrTPS1  | <i>Tripterygium regilii</i>       | KX533965     | Ent-CPP synthase                    | Inabuy et al., 2017                     |
| TrTPS2  | <i>Tripterygium regilii</i>       | KX533964     | CPP synthase                        | Inabuy et al., 2017                     |

|         |                           |          |                                                                 |                     |
|---------|---------------------------|----------|-----------------------------------------------------------------|---------------------|
| TrTPS13 | <i>T. regilii</i>         | KX533966 | Reacted with <i>ent</i> -CPP, CPP and <i>syn</i> -CPP           | Inabuy et al., 2017 |
| TrTPS14 | <i>T. regilii</i>         | KX533967 | <i>Ent-kaurene synthase</i>                                     | Inabuy et al., 2017 |
| TrTPS15 | <i>T. regilii</i>         | KX533968 | <i>ent</i> -manool, (+)-manool, and <i>syn</i> -manool synthase | Inabuy et al., 2017 |
| TrTPS8  | <i>T. regilii</i>         | KY856995 | <i>Miltiradiene synthase</i>                                    | Inabuy et al., 2017 |
| VacTSP1 | <i>Vitex agnus-castus</i> | MG696748 | Peregrinol diphosphate synthase                                 | Heskes et al., 2018 |
| VacTSP2 | <i>V. agnus-castus</i>    | MG696749 | Class I diTPS                                                   | Heskes et al., 2018 |
| VacTSP3 | <i>V. agnus-castus</i>    | MG696750 | Syn-copalyl diphosphate synthase                                | Heskes et al., 2018 |
| VacTSP4 | <i>V. agnus-castus</i>    | MG696751 | Kaurene synthase                                                | Heskes et al., 2018 |
| VacTSP5 | <i>V. agnus-castus</i>    | MG696752 | Kolavenyl diphosphate synthase                                  | Heskes et al., 2018 |
| VacTSP6 | <i>V. agnus-castus</i>    | MG696753 | Class I diTPS                                                   | Heskes et al., 2018 |

Functional annotation is based on the main terpenoid product(s) of recombinant enzymes expressed in *E. coli*. Many TPSs produced multiple products.

**Table S8. Primers used in this study**

| Name        | Sequence(5'to 3')                    |
|-------------|--------------------------------------|
| BZL-CPS1-FF | ggccatggctgatatcgaATGGGCTCTCTATCAACT |
| BZL-CPS1-FR | cgacggagctcgaattcTCACATGACTGGTTCGAA  |
| BZL-CPS2-FF | ggccatggctgatatcgaATGCCTTTCCTCCTCCCT |
| BZL-CPS2FR  | cgacggagctcgaattcTTATTGAACTCTTTCAAA  |
| BZL-KSL1-FF | ggccatggctgatatcgaATGTCGGCCGGGTAAAC  |
| BZL-KSL1-FR | cgacggagctcgaattcTCAGTTTTTGCTGCTAA   |



## Supplemental References

- Ait-Ali T, Swain SM, Reid JB, Sun TP, Kamiya Y. (2003). The LS locus of pea encodes the gibberellin biosynthesis enzyme *ent*-kaurene synthase A. *Plant J.* 11(3): 443-454.
- Bensen RJ, Johal GS, Crane VC, Tossberg JT, Schnable PS, Meeley RB, Briggs SP. (1995). Cloning and characterization of the maize *An1* gene. *Plant Cell* 7(1): 75-84.
- Andersen-Ranberg J, Kongstad KT, Nielsen MT, Jensen NB, Pateraki I, Bach SS, Hamberger B, Zerbe P, Staerk D, Bohlmann J, Moler BL, and Hamberger B. (2016). Expanding the landscape of diterpene structural diversity through stereochemically controlled combinatorial biosynthesis. *Angew. Chem. Int. Ed.* 55:1-6.
- Božić D, Papaefthimiou D, Brückner K, de Vos RC, Tsoleridis CA, Katsarou D, Papanikolaou A, Pateraki I, Chatzopoulou FM, Dimitriadou E, et al. (2015). Towards elucidating carnosic acid biosynthesis in Lamiaceae: functional characterization of the three first steps of the pathway in *Salvia fruticosa* and *Rosmarinus officinalis*. *Plos One* 10: e0124106
- Brückner K, Bozic D, Manzano D, Papaefthimiou D, Pateraki I, Scheler U, Ferrer A, de Vos RC, Kanellis AK, Tissier A. (2014). Characterization of two genes for the biosynthesis of abietane-type diterpenes in rosemary (*Rosmarinus officinalis*) glandular trichomes. *Phytochemistry* 101, 52-64.
- Chen, X., Berim, A., Dayan, F. E., & Gang, D. R. (2017). A (–)-kolavenyl diphosphate synthase catalyzes the first step of salvinorin A biosynthesis in *Salvia divinorum*. *Journal of Experimental Botany*, 68(5), 1109-1122.
- Cho EM, Okada A, Kenmoku H, Otomo K, Toyomasu T, Mitsunashi W, Sassa T, Yajima A, Yabuta G, Mori K, Oikawa H, Toshima H, Shibuya N, Nojiri H, Omori T, Nishiyama M, Yamane H. (2004). Molecular cloning and characterization of a cDNA encoding *ent*-cassa-12, 15-diene synthase, a putative diterpenoid phytoalexin biosynthetic enzyme, from suspension-cultured rice cells treated with a chitin elicitor. *Plant J.* 37(1): 1-8.
- Falara V, Pichersky E, Kanellis AK. (2010). A copal-8-ol diphosphate synthase from the angiosperm *Cistus creticus* subsp. *creticus* is a putative key enzyme for the formation of pharmacologically active, oxygen-containing labdane-type diterpenes. *Plant physiol* 154(1): 301-310.
- Falara V, Akhtar TA, Nguyen TT, Spyropoulou EA, Bleeker PM, Schauvinhold I, Pichersky E. (2011). The tomato terpene synthase gene family. *Plant physiol* 157(2): 770-789.
- Gao W, Hillwig ML, Huang L, Cui G, Wang X, Kong JQ, Yang B, Peters RJ. (2009). A functional genomics approach to tanshinone biosynthesis provides stereochemical insights. *Org Lett* 11(22): 5170-5173.
- Hansen NL, Heskes AM, Hamberger B, Olsen CE, Hallström BM, Andersen-Ranberg J, Hamberger B (2017) The terpene synthase gene family in *Tripterygium wilfordii* harbors a labdane-type diterpene synthase among the monoterpene synthase TPS-b subfamily. *Plant J* 89: 429-441.
- Hayashi KI, Kawaide H, Notomi M, Sakigi Y, Matsuo A, Nozaki H. (2006). Identification and functional analysis of bifunctional *ent*-kaurene synthase from the moss *Physcomitrella patens*. *FEBS Lett* 580(26): 6175-6181.
- Heskes, A.M., Sundram, T.C.M., Boughton, B.A., Jensen, N.B., Hansen, N.L., Crocoll, C., Cozzi, F., Rasmussen, S., Hamberger, B., Hamberger, B., et al. (2018). Biosynthesis of bioactive diterpenoids in the medicinal plant *Vitex agnus-castus*. *The Plant journal* 93: 943-958.
- Hillwig ML, Xu M, Toyomasu T, Tiernan MS, Wei G, Cui G, Huang LQ, Peters RJ. (2011). Domain loss has independently occurred multiple times in plant terpene synthase evolution. *Plant J.* 68(6): 1051-1060.

- Inabuy, F., Fishedick, J. T., Lange, I., Hartmann, M., Srividya, N., & Parrish, A. N., et al. (2017). Biosynthesis of diterpenoids in tripterygium adventitious root cultures. *Plant Physiology*, pp.00659.2017.
- Jackson AJ, Hershey DM, Chesnut T, Xu MM, Peters RJ. (2014). Biochemical characterization of the castor bean *ent*-kaurene synthase(-like) family supports quantum chemical view of diterpene cyclization. *Phytochemistry* 103:13-21.
- Jin BL, Cui GH, Guo J, Tang JF, Duan LX, Lin HX, Shen Y, Chen T, Zhang HB, and Huang LQ. (2017). Functional diversification of kaurene synthase-like genes in *Isodon rubescens*. *Plant physiol.* 174: 943–955
- Keeling CI, Dullat HK, Yuen M, Ralph SG, Jancsik S, Bohlmann J. (2010). Identification and functional characterization of monofunctional *ent*-copalyl diphosphate and *ent*-kaurene synthases in white spruce reveal different patterns for diterpene synthase evolution for primary and secondary metabolism in gymnosperms. *Plant Physiol* 152(3): 1197-1208.
- Keeling CI, Weisshaar S, Ralph SG, Jancsik S, Hamberger B, Dullat HK, Bohlmann J. (2011). Transcriptome mining, functional characterization, and phylogeny of a large terpene synthase gene family in spruce (*Picea* spp.). *BMC Plant Boil* 11(1): 43.
- Li JL, Chen QQ, Jin QP, Gao J, Zhao PJ, Lu S, Zeng Y. (2012). IcCPS2 is potentially involved in the biosynthesis of pharmacologically active *Isodon* diterpenoids rather than gibberellin. *Phytochemistry* 76: 32-39.
- Mafu S, Karunanithi P S, Palazzo T A, et al. Biosynthesis of the microtubule-destabilizing diterpene pseudolaric acid B from golden larch involves an unusual diterpene synthase [J]. *Proceedings of the National Academy of Sciences of the United States of America*, 2017:201612901.
- Margis-Pinheiro M, Zhou XR, Zhu QH, Dennis ES, Upadhyaya NM. (2005). Isolation and characterization of a Ds-tagged rice (*Oryza sativa* L.) GA-responsive dwarf mutant defective in an early step of the gibberellin biosynthesis pathway. *Plant Cell Rep* 23(12): 819-833.
- Martin DM, Fäldt J, Bohlmann J. (2004). Functional characterization of nine Norway spruce TPS genes and evolution of gymnosperm terpene synthases of the TPS-d subfamily. *Plant Physiol* 135(4): 1908-1927.
- Morrone D, Jin Y, Xu M, Choi SY, Coates RM, Peters RJ. (2006). An unexpected diterpene cyclase from rice: functional identification of a stemodene synthase. *Arch. Biochem. Biophys* 448 (1-2):133-140.
- Nakagiri T, Lee JB, Hayashi T. (2005). cDNA cloning, functional expression and characterization of *ent*-copalyl diphosphate synthase from *Scoparia dulcis* L. *Plant Sci* 169(4): 760-767.
- Nemoto T, Cho EM, Okada A, Okada K, Otomo K, Kanno Y, Toyomasu T, Mitsuhashi W, Sassa T, Minami E, Shibuya N, Nishiyama M, Nojiri H, Yamane H. (2004) Stemar-13-ene synthase, a diterpene cyclase involved in the biosynthesis of the phytoalexin oryzalexin S in rice. *FEBS Lett* 571 (1-3): 182-186.
- Otomo K, Kenmoku H, Oikawa H, König WA, Toshima H, Mitsuhashi W, Yamane H, Sassa T, Toyomasu T. (2004). Biological functions of *ent*- and *syn*-copalyl diphosphate synthases in rice: key enzymes for the branch point of gibberellin and phytoalexin biosynthesis. *Plant J* 39(6): 886-893.
- Pateraki I, Andersen-Ranberg J, Hamberger B, Heskies AM, Martens HJ, Zerbe P, Bach SS, Møller BL, Bohlmann J, Hamberger B. (2014). Manoyl oxide (13R), the biosynthetic precursor of forskolin, is synthesized in specialized root cork cells in *Coleus forskohlii*. *Plant Physiol* 164: 1222-1236.
- Pelot KA, Mitchell R, Kwon M, Hagelthorn DM, Wardman JF, Chiang A, Bohlmann J, Ro DK,**

- Zerbe P.** (2017). Biosynthesis of the psychotropic plant diterpene salvinorin A: Discovery and characterization of the *Salvia divinorum* clerodienyl diphosphate synthase. *Plant J* **89**:885-897.
- Pelot K A, Hagelthorn D M, Addison J B, et al. Biosynthesis of the oxygenated diterpene nezukol in the medicinal plant *Isodon rubescens* catalyzed by a pair of diterpene synthases:[J]. *Plos One*, 2017, 12(4):e0176507.
- Prisic S, Xu M, Wilderman PR, Peters RJ. (2004). Rice contains two disparate *ent*-copalyl diphosphate synthases with distinct metabolic functions. *Plant physiol* 136(4): 4228-4236.
- Peters, R. J.(2006) Uncovering the complex metabolic network underlying diterpenoid phytoalexin biosynthesis in rice and other cereal crop plants. *Phytochemistry* 67 (21):2307-2317.
- Richman AS, Gijzen M, Starratt AN, Yang Z, Brandle JE. (1999). Diterpene synthesis in *Stevia rebaudiana*: recruitment and up - regulation of key enzymes from the gibberellin biosynthetic pathway. *Plant J* 19(4): 411-421.
- Sallaud C, Rontein D, Onillon S, Jabes F, Duffe P, Giacalone C, Thoraval S, Escoffier C, Herbette G, Leonhardt N, Causse M, Tissier A. (2009). A novel pathway for sesquiterpene biosynthesis from Z, Z-farnesyl pyrophosphate in the wild tomato *Solanum habrochaites*. *Plant Cell* 21 (1):301-317.
- Sallaud C, Giacalone C, Töpfer R, Goepfert S, Bakaher N, Rösti S, Tissier A. (2012). Characterization of two genes for the biosynthesis of the labdanoid diterpene Z - abienol in tobacco (*Nicotiana tabacum*) glandular trichomes. *Plant J* 72(1): 1-17.
- Sawada Y, Katsumata T, Kitamura J, Kawaide H, Nakajima M, Asami T, Nakaminami K, Kurahashi T, Mitsuhashi W, Inoue Y, Toyomasu T. (2008). Germination of photoblastic lettuce seeds is regulated via the control of endogenous physiologically active gibberellin content, rather than of gibberellin responsiveness. *J Exp Bot* 59 (12), 3383-3393.
- Schalk M, Pastore L, Mirata MA, Khim S, Schouwey M, Deguerry F, Pineda V, Rocci L, Daviet L. (2012). Toward a biosynthetic route to sclareol and amber odorants. *J Am Chem Soc* 134: 18900-18903.
- Schepmann HG, Pang J, Matsuda S. (2001). Cloning and Characterization of *Ginkgo biloba* Levopimaradiene Synthase, Which Catalyzes the First Committed Step in Ginkgolide Biosynthesis. *Arch Biochem Biophys* 392(2): 263-269.
- Schilmiller AL, Schauvinhold I, Larson M, Xu R, Charbonneau AL, Schmidt A, Wilkerson C, Last RL, Pichersky E. (2009). Monoterpenes in the glandular trichomes of tomato are synthesized from a neryl diphosphate precursor rather than geranyl diphosphate. *Proc Natl Acad Sci USA* 106(26):10865-10870.
- Schnee C, Köllner TG, Gershenzon J, Degenhardt J. (2002). The maize gene terpene synthase 1 encodes a sesquiterpene synthase catalyzing the formation of (E)- $\beta$ -farnesene, (E)-nerolidol, and (E, E)-farnesol after herbivore damage. *Plant physiol* 130(4): 2049-2060.
- Smith MW, Yamaguchi S, Ait-Ali T, Kamiya Y. (1998). The first step of gibberellin biosynthesis in pumpkin is catalyzed by at least two copalyl diphosphate synthases encoded by differentially regulated genes. *Plant physiol* 118(4): 1411-1419.
- Spielmeyer W, Ellis M, Robertson M, Ali S, Lenton JR, Chandler PM. (2004). Isolation of gibberellin metabolic pathway genes from barley and comparative mapping in barley, wheat and rice. *Theor Appl Genet* 109(4): 847-855.
- Sugai Y, Ueno Y, Hayashi K, Oogami S, Toyomasu T, Matsumoto S, Natsume M, Nozaki H, Kawaide H. (2011). Enzymatic <sup>13</sup>C labeling and multidimensional NMR analysis of miltiradiene synthesized by bifunctional diterpene cyclase in *Selaginella moellendorffii*. *J Biol Chem* 286(50): 42840-42847.

- Sun TP, Kamiya Y. (1994). The Arabidopsis GA1 locus encodes the cyclaseent –kaurene synthetase A of gibberellin biosynthesis. *Plant Cell* 6(10): 1509-1518.
- Tuskan GA, Difazio S, Jansson S, Bohlmann J, Grigoriev I, Hellsten U, Putnam N, Ralph S, Rombauts S, Salamov A, et al. (2006). The genome of black cottonwood, *Populus trichocarpa* (Torr. & Gray) *Science* 313 (5793):1596-1604.
- Vogel BS, Wildung MR, Vogel G, Croteau R. (1996). Abietadiene synthase from grand fir (*Abies grandis*) cDNA isolation, characterization, and bacterial expression of a bifunctionalditerpenecyclase involved in resin acid biosynthesis. *J Biol Chem* 271(38): 23262-23268.
- Wilderman PR, Xu M, Jin Y, Coates RM, Peters RJ. (2004). Identification of *syn*-pimara-7, 15-diene synthase reveals functional clustering of terpene synthases involved in rice phytoalexin/allelochemical biosynthesis. *Plant physiol* 135(4): 2098-2105.
- Wildung MR, Croteau R. (1996). A cDNA clone for taxadiene synthase, the diterpenecyclase that catalyzes the committed step of taxol biosynthesis. *J Biol Chem* 271(16): 9201-9204.
- Xu MM, Hillwig ML, Pristic S, Coates RM, Peters RJ. (2004). Functional identification of rice *syn*-copalyl diphosphate synthase and its role in initiating biosynthesis of diterpenoidphytoalexin/allelopathic natural products. *Plant J* 39(3): 309-318.
- Xu MM, Wilderman PR, Morrone D, Xu J, Roy A, Margis-Pinheiro M, Upadhyaya NM, Coates RM, Peters RJ. (2007). Functional characterization of the rice kaurene synthase-like gene family. *Phytochemistry* 68 (3): 312-326.
- Yamaguchi S, Saito T, Abe H, Yamane H, Murofushi N, Kamiya Y. (1996). Molecular cloning and characterization of a cDNA encoding the gibberellin biosynthetic enzyme *ent*-kaurene synthase B from pumpkin (*Cucurbita maxima* L.). *Plant J* 10(2): 203-213.
- Yamaguchi S, Sun TP, Kawaide H, Kamiya Y. (1998). The GA2 Locus of *Arabidopsis thaliana* encodes *ent*-kaurene synthase of gibberellin biosynthesis. *Plant Physiol* 116(4): 1271-1278.
- Zerbe P, Chiang A, Yuen M, Hamberger B, Hamberger B, Draper JA, Bohlmann J. (2012). Bifunctionalcis-abienol synthase from *Abies balsamea* discovered by transcriptome sequencing and its implications for diterpenoid fragrance production. *J Biol Chem* 287(15): 12121-12131.
- Zerbe P, Hamberger B, Yuen M, Chiang A, Sandhu H, Madilao L, Nguyen A, Hamberger B, Bach SS, Bohlmann J. (2013). Gene discovery of modular diterpene metabolism in nonmodel systems. *Plant Physiol* 162:1073-1091.
- Zerbe P, Chiang A, Dullat H, O'Neil-Johnson M, Starks C, Hamberger B, Bohlmann J. (2014). Diterpene synthases of the biosynthetic system of medicinally active diterpenoids in *Marrubium vulgare*. *Plant J* 79(6):914-27.
- Zerbe P, Rodriguez SM, Mafu S, Chiang A, Sandhu H K., O'Neil-Johnson M, Starks CM and Bohlmann J. (2015). Exploring diterpene metabolism in non-model species: transcriptome-enabled discovery and functional characterization of labda-7,13E-dienyl diphosphate synthase from *Grindelia robusta*. *The Plant J.* 83: 783-793.
